# Supplementary material for: Synergistic peptide–organic matrix enhances mineralization of biomimetic scaffolds for bone regeneration
Source: Royal Society of Chemistry journal article supplement (doi:10.1039/d5mh00969c), 2025-01-01
Supplement: d5mh00969c1.pdf [file d5mh00969c1.pdf]

## *Supporting Information*

### **Synergistic Peptide-Organic Matrix Enhances Mineralization of Biomimetic Scaffold for Bone Regeneration**

Yawen Huang<sup>1</sup>, Ziqi Zhao<sup>1</sup>, Yu Yang<sup>1</sup>, Ruiqi Mao<sup>1</sup>, Dongxuan Li<sup>1</sup>, Fengxiong Luo<sup>1</sup>, Kefeng Wang<sup>1, 2, 3 \*</sup>, Yujiang Fan<sup>1</sup>, Xingdong Zhang<sup>1, 2</sup>

<sup>1</sup> National Engineering Research Center for Biomaterials, Sichuan University,  
Chengdu 610064, China

<sup>2</sup> Research Center for Material Genome Engineering, Sichuan University,  
Chengdu 610064, China

<sup>3</sup> Provincial Engineering Research Center for Biomaterials Genome of Sichuan,  
Chengdu 610064, China

\*Corresponding author: KF Wang, fencal@scu.edu.cn

**Table S1.** qRT-PCR target genes and their primer sequences.

| <b>Gene</b>   | <b>Premier (5'-3')</b>                                                        |
|---------------|-------------------------------------------------------------------------------|
| <b>GAPDH</b>  | FORWARD : GCACTGTTGAAGTCGCAGGAGA<br>REVERSE : CCGCCCAGAACATCATCCCT            |
| <b>COL I</b>  | FORWARD : GGCAAAGAAGGCGGCAAAGG<br>REVERSE : GGAGCACCAGCAGGACCATC<br>FORWARD : |
| <b>Spp 1</b>  | CAGAATCTCCTAACACCGCAGAATG<br>REVERSE : TGGTCATCGTCCTCATCCTCATC                |
| <b>Runx 2</b> | FORWARD : AGCAGCAGCAGCAACAGCAG<br>REVERSE : GCAGCACCGAGCACAGGAAG              |
| <b>BMP2</b>   | FORWARD : GCCAGATCAGTCCCTTTG<br>REVERSE : TCACGCCGCACAGGTAGG                  |

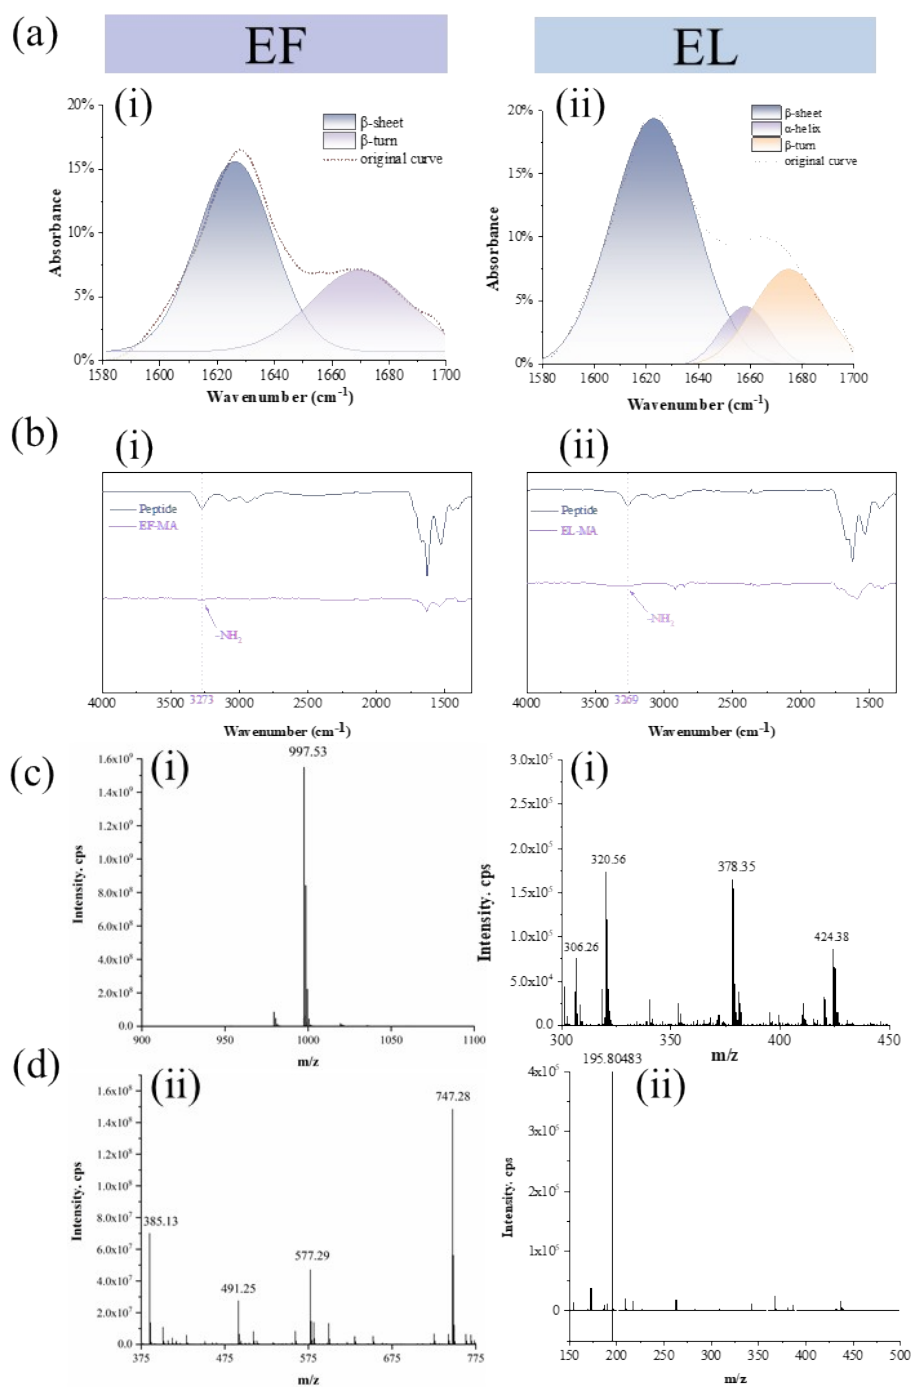

Figure S1. Characterization of basic material preparation. (a) FTIR spectrum of peptide conformation, (i) EF, (ii) EL; (b) FTIR spectrum of peptide and peptide-MA, (i) EF, (ii) EL; (c) ESI-MS spectrum of HG and EE peptide, (i) EF, (ii) EL; (d) ESI-MS spectrum of peptide-MA, (i) EF, (ii) EL.

**Table S2.** FTIR spectra of conformation results of different sequence peptides

| Peptide                         | $\alpha$ -helix | $\beta$ -sheet | turn   |
|---------------------------------|-----------------|----------------|--------|
| <b>HGRGEAFDY</b><br><b>(HG)</b> | 44.81%          | 54.29%         | 0.91%  |
| <b>EFKADFKL</b><br><b>(EF)</b>  | 0               | 65.14%         | 34.86% |
| <b>ELRKDDFK</b><br><b>(EL)</b>  | 22.17%          | 38.22%         | 32.47% |
| <b>EEGYRHIC</b><br><b>(EE)</b>  | 0               | 65.34%         | 34.66% |

SI-1

As shown in Figure S2, only a few scattered mineral particles were present on the surface of GelMA, without a well-defined spherical morphology. These particles were sparsely distributed, covering only a small portion of the field of view. In EF peptide-containing hydrogels, mineral deposition increased with EF peptide concentration. The hydroxyapatite structures became more distinctly spherical and exhibited a tendency to aggregate, primarily along the GelMA ridges. Notably, in the 0.24%-GelMA group, the surface was almost entirely covered with minerals, with spherical particles merging into a layered structure, indicating a significant enhancement in mineralization. Based on these findings, the 0.24%-GelMA group, which demonstrated the most effective mineralization, was selected for further study.

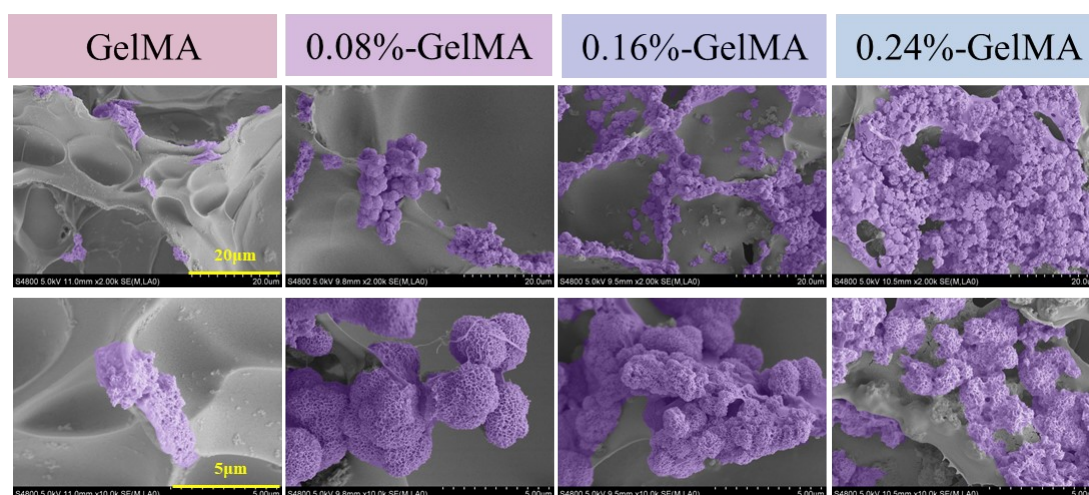

Figure S2. SEM image of different peptide-GelMA mineralized in SBF for 1 days respectively.

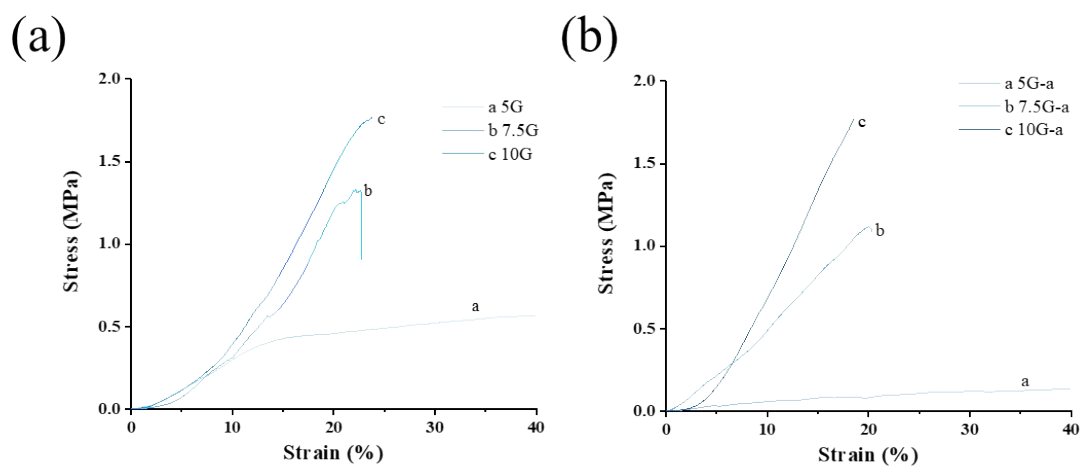

Figure S3. The stress-strain curves of samples. (a) Pure GelMA matrices with varying concentrations; (b) 3 days of enzymatic mineralization with varying concentrations.

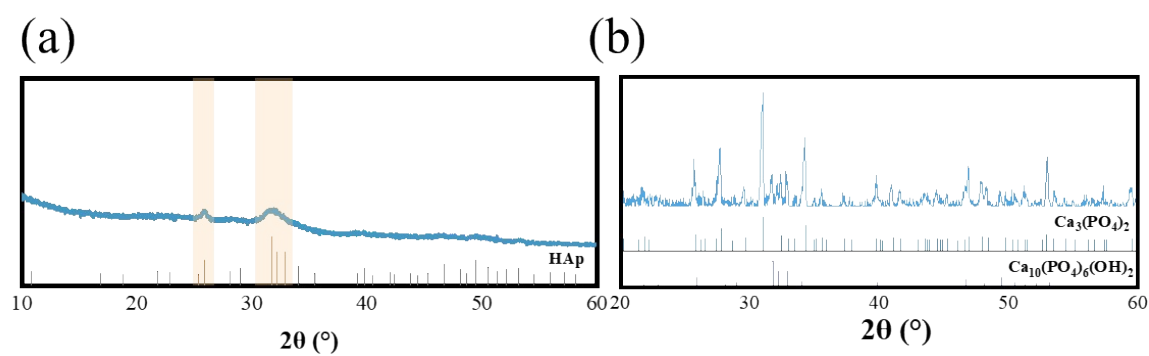

Figure S4. XRD patterns of enzymatic mineralized samples (5G-a). (a) Before sinter; (b) After sinter.

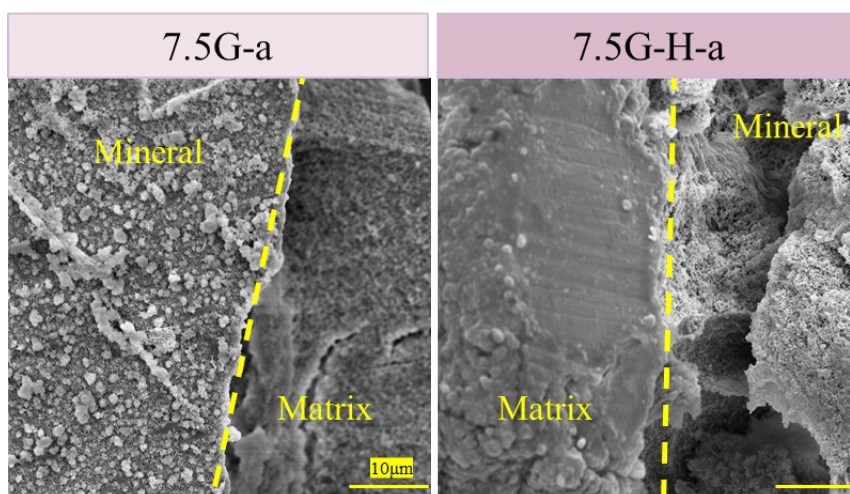

Figure S5. SEM images of hydrogels mineralized for 5 days.

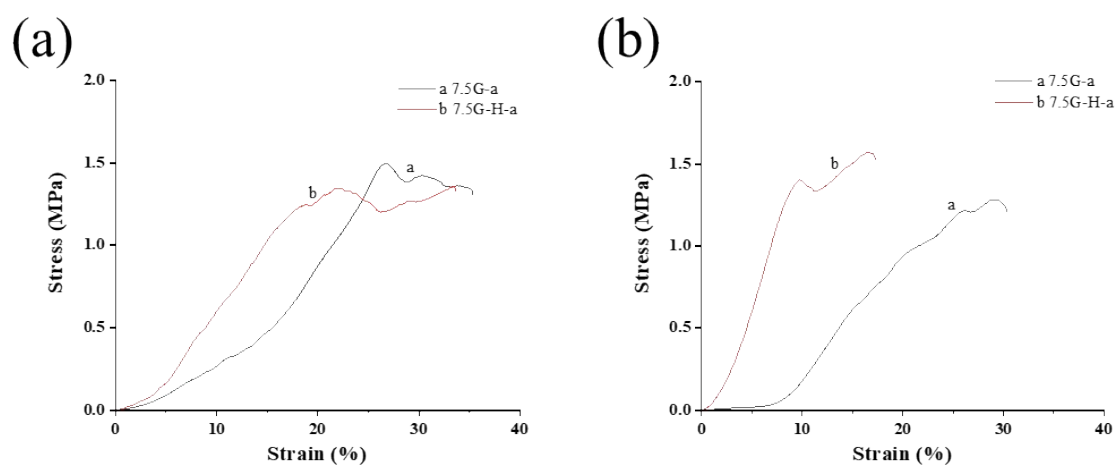

Figure S6. The stress-strain curves of 7.5G-H-a and 7.5G-a samples after mineralization. (a) 3 Days; (b) 5 Days.

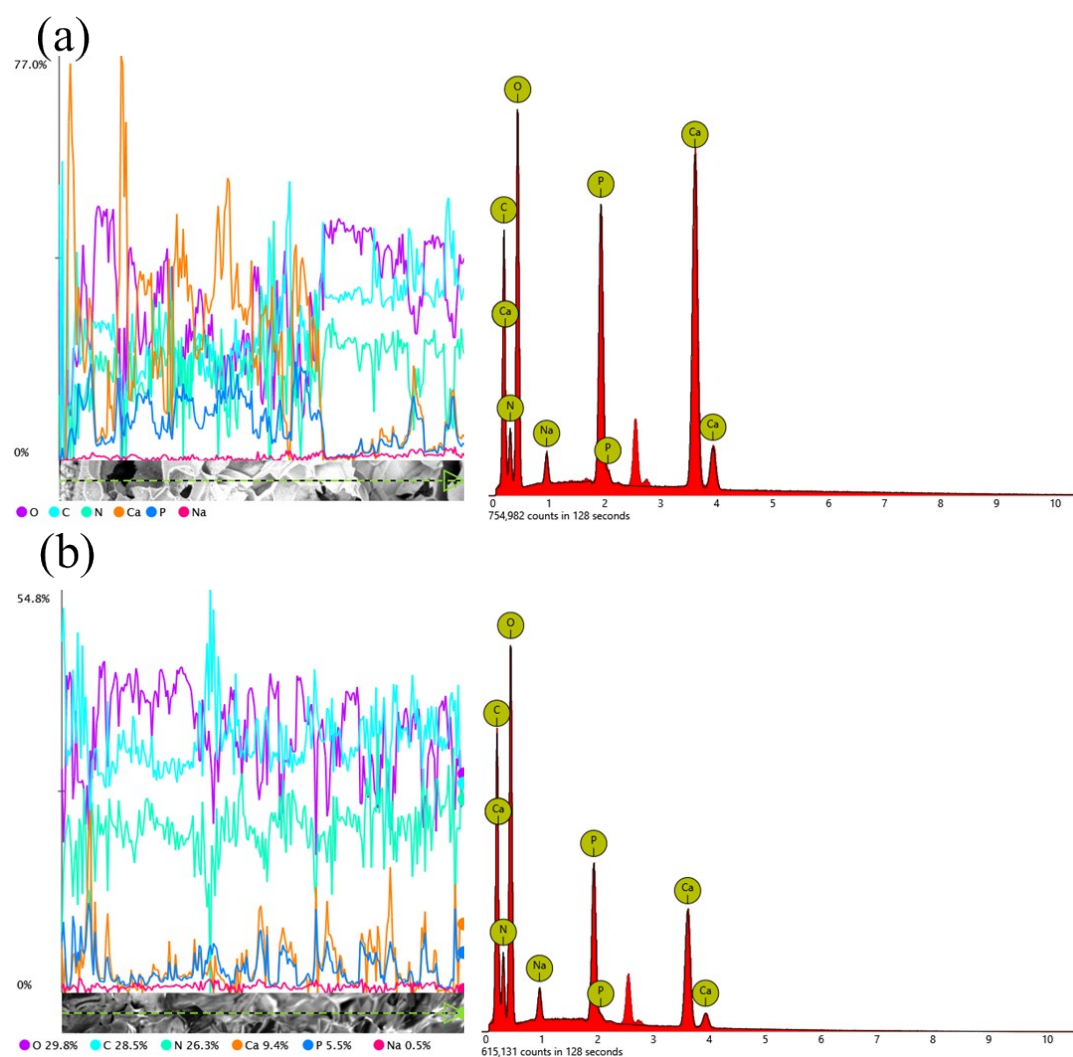

Figure S7.EDS analysis of 5G-H-a; (a)Outer; (b)Inner.



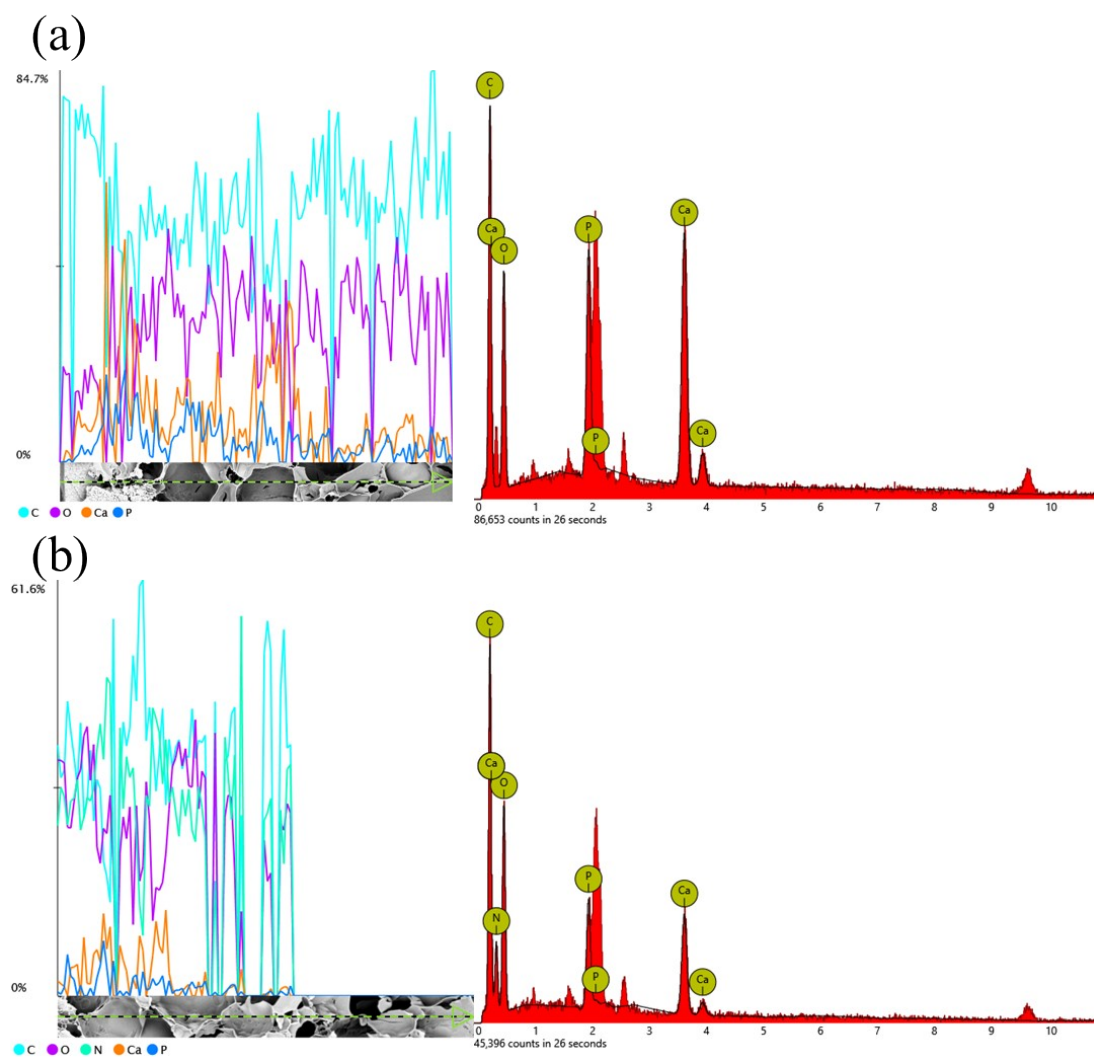

Figure S8.EDS analysis of 7.5G-H-a; (a)Outer; (b)Inner.

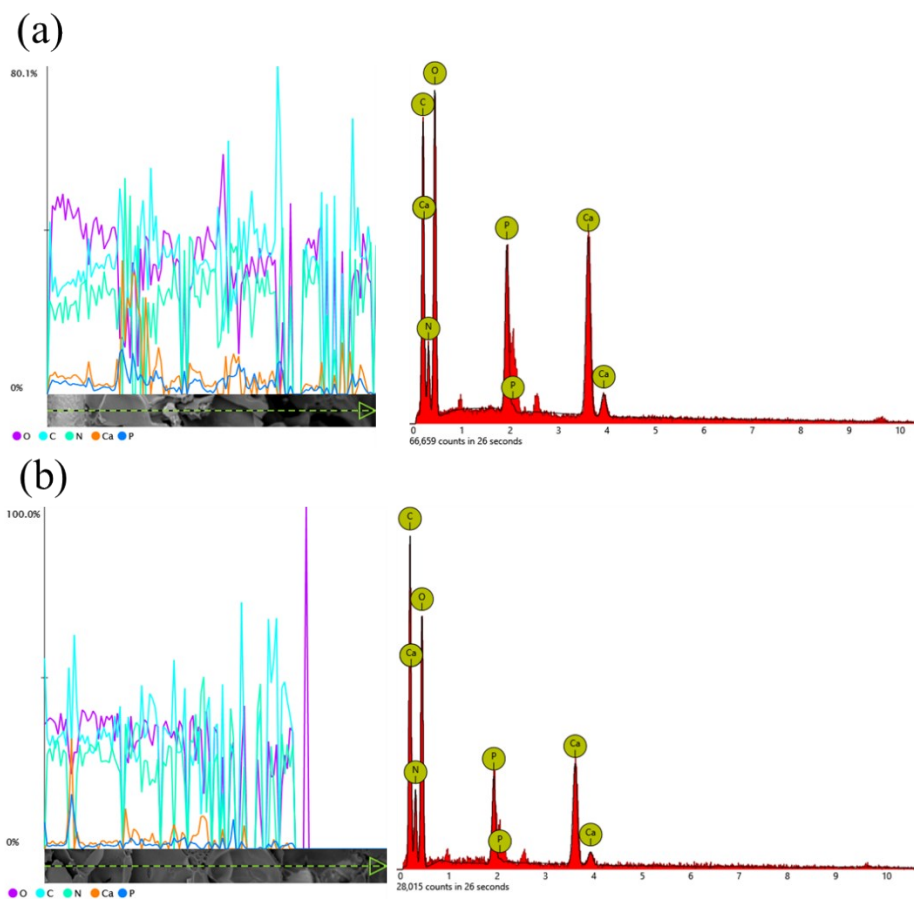

Figure S9.EDS analysis of 10G-H-a; (a)Outer; (b)Inner.

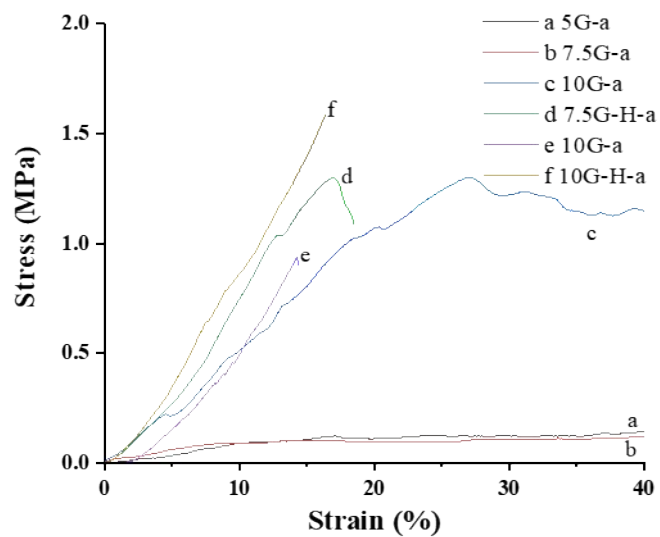

Figure S10. The stress-strain curves of mineralized hydrogels (5G-a, 5G-H-a, 7.5G-a, 7.5G-H-a, 10G-a, 10G-H-a).

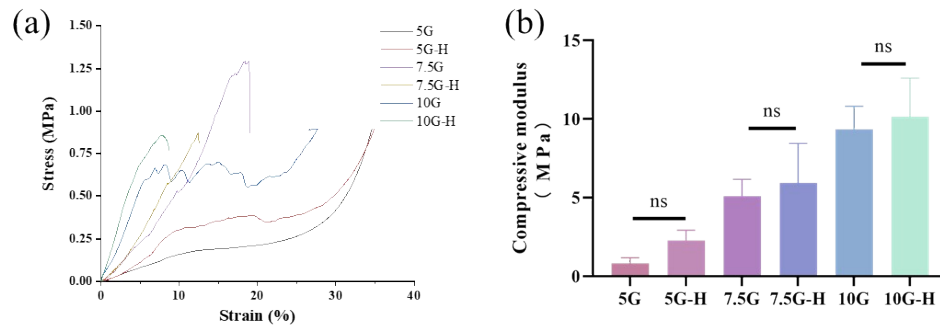

Figure S11. Compressive properties of non-mineralized GelMA hydrogels with or without HG peptide at different concentrations. (a) The stress-strain curves of samples; (b) Compressive modulus of hydrogels.
